## Myocardial injury in patients hospitalized for SARS-CoV19: a maker or a marker of prognosis?

C. Montalto<sup>1</sup>, S. Ghio<sup>2</sup>, M. Pagnesi<sup>3</sup>, A. Cappelletti<sup>3</sup>, L. Baldetti<sup>3</sup>, E. Baldi<sup>2</sup>, C. Lombardi<sup>4</sup>, L. Lupi<sup>4</sup>, M. Metra<sup>4</sup>, S. Perlini<sup>1</sup>, L. Oltrona-Visconti<sup>2</sup>

<sup>1</sup>University of Pavia, Pavia, Italy; <sup>2</sup>Policlinic Foundation San Matteo IRCCS, Division of Cardiology, Pavia, Italy; <sup>3</sup>IRCCS San Raffaele Hospital, Milan, Italy; <sup>4</sup>Civil Hospital of Brescia, Brescia, Italy

**Funding Acknowledgement:** Type of funding sources: None.

**Background:** Since the beginning of the coronavirus disease 2019 (COVID-19) pandemic, literature data are progressively accumulating, at-testing to the possible prognostic role of cardiac troponins in patients who need hospitalization because of COVID-19 infection.

**Purpose:** To assess whether myocardial injury (measured by high sensitivity troponins) is an independent cause of disease severity and prognosis.

**Methods:** We performed a patient-level metanalysis (PROSPERO ID: CRD42020213209) in unselected patients hospitalized because of COVID-19 infection in whom the severity of respiratory failure was also evaluated at admission. To allow for comparison, troponin values were normalized to their threshold levels to obtain a normalized troponin (nTn) value which was used as a continuous variable in all analysis.

**Results:** A total of 722 patients were included in the analysis. Of note, patients who had elevated troponins at hospital admission had a significantly lower oxygenation status than those with normal nTn (PaO<sub>2</sub>/FiO<sub>2</sub> 232±215 vs. 276±124 mmHg/%; p<0.001). On the contrary, those with cardiovascu-

lar comorbidities had similar PaO<sub>2</sub>/FiO<sub>2</sub> but higher nTn than those without (5.6817 vs. 2.1110 ng/mL; p=0.002).

After a median follow-up of 14 days, 180 deaths were observed. At multivariable regression analysis, age, male sex, moderate-severe renal dysfunction (eGFR <30 mL/min/m<sup>2</sup>) and lower PaO<sub>2</sub>/FiO<sub>2</sub>, were independent predictor of death (figure 1). The restricted cubic spline curves in Figure 2A and 2B show the hazard ratios (HRs) and 95% confidence interval for death according to nTn and PaO<sub>2</sub>/FiO<sub>2</sub> levels as continuous variables. A linear increase in the HR is observed with lower PaO<sub>2</sub>/FiO<sub>2</sub> values below the normal value of 300. On the contrary, the nTn spline curve is near-flat with large confidence interval for values above the normality thresholds.

**Conclusion:** In patients hospitalized for COVID-19, mortality is mainly driven by gender, age and respiratory failure while myocardial damage is not an independent predictor of worse survival when respiratory function is accounted for.

|                                     |       |       |       |         |
|-------------------------------------|-------|-------|-------|---------|
| Age                                 | 1.083 | 1.061 | 1.105 | <0.0001 |
| Male sex                            | 2.049 | 1.319 | 3.184 | 0.0014  |
| eGFR < 30 mL/min                    | 2.108 | 1.237 | 3.594 | 0.0061  |
| PO <sub>2</sub> /FiO <sub>2</sub> * | 1.110 | 1.206 | 1.022 | 0.0133  |
| Diabetes mellitus                   | 1.472 | 0.988 | 2.193 | 0.0573  |
| normalized hs-Tn                    | 1.014 | 0.996 | 1.032 | 0.1232  |
| Cancer                              | 0.692 | 0.429 | 1.115 | 0.1303  |
| Cardiovascular comorbidities        | 1.168 | 0.800 | 1.706 | 0.4217  |
| Anemia                              | 1.069 | 0.728 | 1.569 | 0.7350  |

\* per each 50 mmHg/% decrease

Figure 1

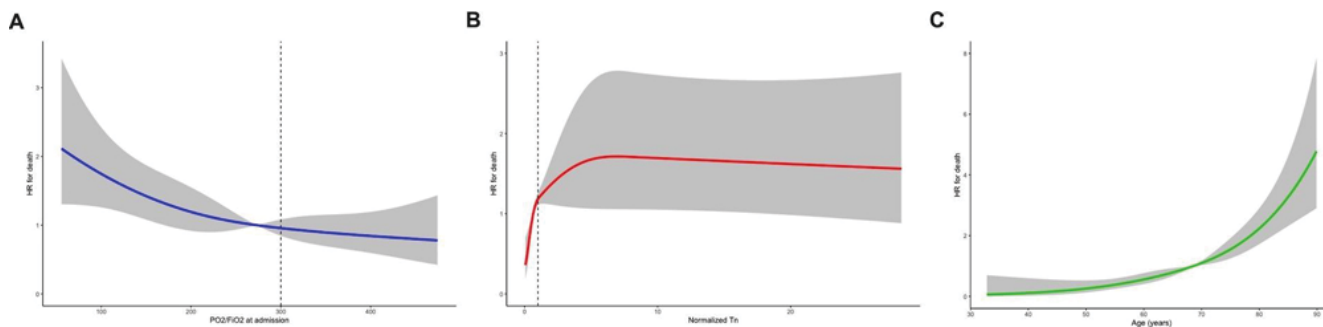

Figure 2
